# Supplementary material
Source: Springer Nature journal article supplement (https://www.springermedizin.de/resource/supplementary/12943_2011_949_MOESM9_ESM.pdf/9551742)

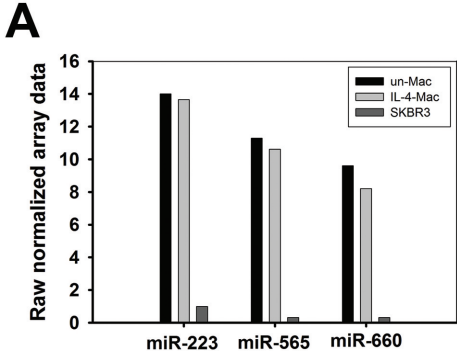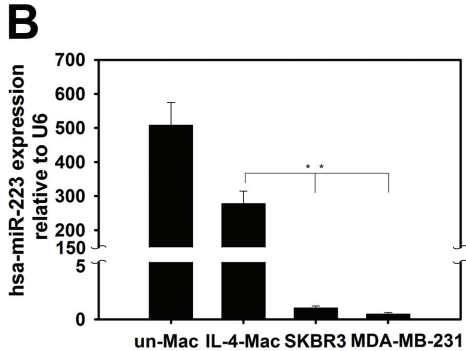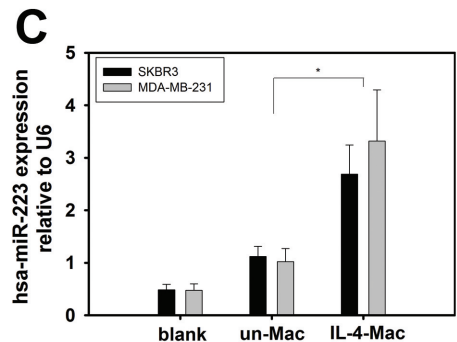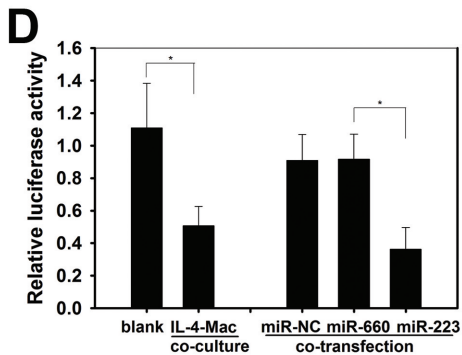

Supplement: MOESM9 [file 9551742]
